# Supplementary material for: Molecular and Functional Imaging for Detection of Lymph Node Metastases in Prostate Cancer
Source: Int J Mol Sci. 2013 Jul 3;14(7):13842–57. doi: 10.3390/ijms140713842 (PMC3742221; doi:10.3390/ijms140713842)
Supplement: Supplementary file 1 [file ijms-14-13842-s001.pdf]

## Supplementary Information

**Table S1.** Pro's and Con's of imaging techniques in detecting prostate lymph node metastases.

| Modality                                               | Technique                                                                                                                                                                       | Pro                                                                                                                                                                      | Con                                                                                                                                                                                                           |
|--------------------------------------------------------|---------------------------------------------------------------------------------------------------------------------------------------------------------------------------------|--------------------------------------------------------------------------------------------------------------------------------------------------------------------------|---------------------------------------------------------------------------------------------------------------------------------------------------------------------------------------------------------------|
| <b>Conventional imaging</b>                            |                                                                                                                                                                                 |                                                                                                                                                                          |                                                                                                                                                                                                               |
| CT                                                     | Anatomical imaging using CT                                                                                                                                                     | Fast imaging<br>Low costs                                                                                                                                                | Rely on size criteria only<br>Radiation risk                                                                                                                                                                  |
| MRI                                                    | Anatomical imaging using MRI                                                                                                                                                    | No radiation risk                                                                                                                                                        | Rely on size<br>criteria only                                                                                                                                                                                 |
| <b>Planar scintigraphy, SPECT and gamma probe</b>      |                                                                                                                                                                                 |                                                                                                                                                                          |                                                                                                                                                                                                               |
| Sentinel lymph node imaging with scintigraphy or SPECT | Gamma ray emitting radionuclide coupled to tracer (e.g. using $^{99m}\text{Tc}$ -nanocolloid), detected by external gamma camera to form 2D (scintigraphy) or 3D (SPECT) images | Provides anatomical and functional information when combined with CT/MRI.<br>Valuable for Gleason 8 or lower                                                             | During surgery additional sentinel nodes in 40%<br>Full metastatic lymph nodes can become invisible resulting in false negatives                                                                              |
| Radiolabeled monoclonal antibodies                     | Radiolabeled monoclonal antibodies targeted to PSMA (e.g. 111-indium capromab penetide, $^{89}\text{Zr}$ -J591). Radiolabeled small molecules                                   | Possibility to target prostate cancer and its metastases specifically<br>Possibilities for targeting treatment<br>Excellent pharmacokinetic and pharmacodynamics profile | Only 1 FDA approved radiolabeled monoclonal antibody (Prostascint).<br>Only accessible in case of necrosis and apoptosis (first generation).<br>Only very early results, clinical value has to be established |

Table S1. Cont.

| Modality                                  | Technique                                                                                                                                           | Pro                                                                                                                                         | Con                                                                                                                           |
|-------------------------------------------|-----------------------------------------------------------------------------------------------------------------------------------------------------|---------------------------------------------------------------------------------------------------------------------------------------------|-------------------------------------------------------------------------------------------------------------------------------|
| <b>Positron emission tomography (PET)</b> |                                                                                                                                                     |                                                                                                                                             |                                                                                                                               |
| FDG                                       | Detects increased glucose metabolism in most tumors                                                                                                 | Good results in other tumors                                                                                                                | Low uptake of glucose in prostate cancer.<br>Renal excretion can obscure pelvic lymph nodes.                                  |
| <sup>11</sup> C-Choline                   | Choline kinase upregulated in prostate cancer and metastases                                                                                        | Minimal urinary excretion                                                                                                                   | Low sensitivity small lymph nodes.<br>Short half-life (20 min) requires onsite cyclotron.                                     |
| <sup>18</sup> F-Choline                   | Choline kinase upregulated in prostate cancer and metastases                                                                                        | Longer half-life (110 min).<br>Possibility of PET/MRI in future to improve resolution                                                       | Greater urinary excretion than <sup>11</sup> C-Choline                                                                        |
| <sup>11</sup> C -Acetate                  | Acetate role in fatty acid metabolism. Fatty acid synthase overexpressed in prostate cancer                                                         | Minimal urinary excretion                                                                                                                   | Short half-life (20 min) requires onsite cyclotron.<br><sup>11</sup> C –Acetate uptake shows a positive correlation with PSA. |
| <sup>68</sup> Ga-labelled PSMA ligand     | Ligand targeted to PSMA                                                                                                                             | Good contrast uptake in small lymph nodes.<br>Promising results with lower PSA values.                                                      | Only early results available.                                                                                                 |
| <b>Functional and molecular MRI</b>       |                                                                                                                                                     |                                                                                                                                             |                                                                                                                               |
| Diffusion weighted imaging (DWI)          | Diffusion of water molecules (Brownian motion), diffusion coefficient (ADC) is calculated                                                           | Diffusion in metastatic lymph nodes differs potentially from benign lymph nodes                                                             | Results for smaller lymph nodes are disappointing.<br>Overlap in ADC value.                                                   |
| Magnetic resonance lymphography (MRL)     | Uptake of ultra-small super paramagnetic iron oxide (USPIO) (e.g. ferumoxtran-10) by macrophages in normal lymph node tissue imaged with T2* images | Uptake in normal lymph nodes, therefore no minimal uptake in metastases required and also very small lymph node metastases can be detected. | Ferumoxtran-10 is currently not available for clinical routine use.                                                           |
